# Supplementary material
Source: HighWire-hosted journal article supplement (https://bmjopen.bmj.com/content/12/4/e056732)
Supplement: inline-supplementary-material-3 [file inline-supplementary-material-3.pdf]

Datenbank: APA PsycInfo <1806 to January Week 4 2021>

Suchstrategie:

- 
- 1 (Checking\* or gazing\* or "safety behavi\*r" or "reassurance seek\*").ti,ab. (7270)
  - 2 obsessive compulsive disorder/ or compulsions/ or Generalized Anxiety Disorder/ or worry.ti,ab. or eating disorders/ or anorexia nervosa/ or binge eating disorder/ or bulimia/ or body image/ or body image disturbances/ or body dysmorphic disorder/ or dissatisfaction/ or hypochondriasis/ or health anxiety/ (70340)
  - 3 1 and 2 (1197)
  - 4 limit 3 to human (1152)

\*\*\*\*\*
