# Supplementary material
Source: HighWire-hosted journal article supplement (https://bmjopen.bmj.com/content/12/4/e056732)
Supplement: inline-supplementary-material-4 [file inline-supplementary-material-4.pdf]

## Data Extraction Form

Reviewer:

Date:

### Disorder:

OCD  GAD  ED  BDD  IAD  
 clinical  analogue

### Research question:

(1) situation  (2a) short-term  (2b) long-term

## BASIC CHARACTERISTICS

Ref ID:

Author(s):

Publication title:

Publication year:

Country:

## SAMPLE

Sample Size:

Average Age:

Gender:

Type of sample:

- Diagnosis and criteria for diagnosis (clinical samples):
- Type of symptoms (analogue samples):

Co-morbidities:

## STUDY DESIGN

Setting:

Type of CB investigated:

Assessment time points:

Instruments for the assessment of outcomes and types of outcomes investigated:

## STUDY RESULTS

Research question and outcome:

**Brief summary** (add research question and disorder in each case):

– Confirmed  Rejected
